# Supplementary material
Source: publisher figshare collection journal article supplement (https://osapublishing.figshare.com/ndownloader/files/16685354)
Supplement: Supplementary file 1 [file 16685354]

## Sheet: Sheet1
Table S1. The Performance Tests of the Devices A-C for Multiple Samples
Device A	Errors on increasing launched power	Device B	Errors on increasing launched power2	Device C	Errors on increasing launched power3
16.1	0.05	7.65	0.05	17.32	0.09
18.35	0.03	6.51	0.09	17.24	0.05
14.14	0.04	8.7	0.04	17.21	0.06
				15.19	0.08
				15.55	0.06
				15.92	0.07
				15.58	0.07
				14.56	0.07
				14.16	0.05
				12.8	0.08
				12.6	0.1
			Mean (± standard deviation) (dB)	15.2845	(± 1,58)
